# Supplementary material
Source: MDPI journal article supplement (https://www.mdpi.com/2414-4088/5/5/26)
Supplement: s1 [file s1]

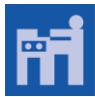

Article

# Teleoperation of Highly Automated Vehicles in Public Transport: User-Centered Design of a Human-Machine Interface for Remote-Operation and its Expert Usability Evaluation

Carmen Kettwich <sup>1, \*</sup>, Andreas Schrank <sup>1</sup> and Michael Oehl <sup>1</sup>

<sup>1</sup> German Aerospace Center (DLR), Braunschweig, Germany; {Carmen.Kettwich; Andreas.Schrank; Michael.Oehl}@dlr.de

\* Correspondence: Carmen.Kettwich@dlr.de

**Citation:** Kettwich, C.; Schrank, A.; Oehl, M. Teleoperation of Highly Automated Vehicles in Public Transport: User-Centered Design of a Human-Machine Interface for Remote-Operation and its Expert Usability Evaluation. *Multimodal Technol. Interact.* **2021**, *5*, 26.  
<https://doi.org/10.3390/mti5050026>

Academic Editors: Shadan Sadeghian Borojeni and Philipp Wintersberger

Received: 13 February 2021

Accepted: 3 May 2021

Published: 5 May 2021

**Publisher's Note:** MDPI stays neutral with regard to jurisdictional claims in published maps and institutional affiliations.

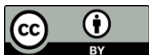

**Copyright:** © 2021 by the authors. Submitted for possible open access publication under the terms and conditions of the Creative Commons Attribution (CC BY) license (<http://creativecommons.org/licenses/by/4.0/>).

## Supplementary Materials

Table S1. Overview of features liked (complete)

| Feature Liked                                        | N | Typical Utterance                                                                                   |
|------------------------------------------------------|---|-----------------------------------------------------------------------------------------------------|
| <i>Design</i>                                        |   |                                                                                                     |
| Division of Screens                                  | 4 | "I like how the information is distributed across several monitors"                                 |
| Clarity                                              | 2 | "I liked the interface very much, it is very clear and logically structured"                        |
| Display of Relevant Information                      | 2 | "I was not disturbed by unnecessary notifications"                                                  |
| Number of Menu Levels                                | 1 | "There aren't too many submenus"                                                                    |
| Adjustment of Menus                                  | 1 | "The menus adjust depending on the situation, normal operations or disturbed operations"            |
| Integration of Disturbance Notification and Map View | 1 | "There was a link between incoming notifications and the map view"                                  |
| Selection of Singular Vehicles                       | 1 | „You can choose shuttles individually by entering their number“                                     |
| <i>Details Screen</i>                                |   |                                                                                                     |
| Shuttle Details                                      | 1 | "I like the way details about the shuttle are presented"                                            |
| <i>Disturbances Screen</i>                           |   |                                                                                                     |
| Steps to Overcome Disturbance                        | 4 | "The process is logical, practicable, and pretty clear"                                             |
| Communication Link                                   | 2 | "You can directly get in touch with other people"                                                   |
| Presentation of Disturbances                         | 2 | "Whenever something was not in order, the details about it were presented with an exclamation mark" |
| Disturbances Screen                                  | 2 | "I appreciate that the central screen is reserved for incoming disturbance notifications"           |
| Distribution of Tasks for Processing Disturbances    | 2 | "Accepting a task makes clear who is responsible for what"                                          |
| Communication Link to Passengers                     | 1 | "I can directly address the passengers in the cabin"                                                |
| Acceptance of Disturbance Notification               | 1 | "It is innovative that you can accept the disturbance notification"                                 |
| <i>Map Screen</i>                                    |   |                                                                                                     |
| Focus on Current Vehicle                             | 1 | "I can focus on a single vehicle on the map"                                                        |
| <i>Touchscreen</i>                                   |   |                                                                                                     |
| Waypoints                                            | 2 | "Setting waypoints is useful to get the shuttle away from the road"                                 |
| <i>Video Screens</i>                                 |   |                                                                                                     |
| Video Images                                         | 5 | "The video images are very helpful"                                                                 |

Table S2. Overview of features missed (complete)

| Feature Missed                                                     | N | M<br>Importance | Typical Utterance                                                                                                       |
|--------------------------------------------------------------------|---|-----------------|-------------------------------------------------------------------------------------------------------------------------|
| <i>Shuttle Details</i>                                             |   |                 |                                                                                                                         |
| Relevant Information about Disturbances                            | 2 | 4.50            | "It would be better to focus on important things"                                                                       |
| Less Screens                                                       | 2 | 4.50            | "There should not be more than five monitors"                                                                           |
| More Intuitive Design                                              | 1 | 5.00            | "The presentation should be more fluent and intuitive"                                                                  |
| Distribution of Information on Screens                             | 1 | 5.00            | "You don't need to dedicate a whole screen to some of the features"                                                     |
| Display of Vehicle Type                                            | 1 | 5.00            | "Maybe the type of the vehicle could be displayed"                                                                      |
| Display of Technical Systems                                       | 1 | 5.00            | "An extension by a display of technical facilities would be helpful"                                                    |
| Flexible Expandability                                             | 1 | 5.00            | "I would embrace the option to flexibly extend the interface by additional features"                                    |
| Display of Occupancy                                               | 1 | 3.00            | "I would appreciate to be shown a percentage of seats currently occupied"                                               |
| <i>Disturbance Ticker</i>                                          |   |                 |                                                                                                                         |
| Prioritization of Disturbances (Using Color-Coding)                | 3 | 5.00            | "Priority should be given to passenger emergency calls"                                                                 |
| Visual Highlighting of Incoming Notifications                      | 3 | 4.67            | "Incoming notifications should be visually highlighted"                                                                 |
| Auditory Highlighting of Incoming Notifications                    | 2 | 4.50            | "I want to hear a sound when a notification comes in"                                                                   |
| Interactions between Disturbances Concerning Different Vehicles    | 1 | 5.00            | "I want to see if and how a disturbance of one shuttle has an impact on another one"                                    |
| Direct Order of Substitute Vehicle                                 | 1 | 5.00            | "I want to be able to directly order another vehicle to replace the malfunctioning one"                                 |
| One Click Only to Accept Disturbance Notifications                 | 1 | 4.00            | "Accepting and processing the disturbance should be combined so I only need to click once"                              |
| Direct Setup of Bypasses                                           | 1 | 4.00            | "Setting up a bypass spontaneously enables me to deal with accidents"                                                   |
| Display of Time Passed since Reception of Disturbance Notification | 1 | 3.00            | "I want to see when the disturbance entered the system so I know for how long it has been there to assess its priority" |
| <i>Map View</i>                                                    |   |                 |                                                                                                                         |
| Clear (Colorful) Display of Trajectory                             | 2 | 4.50            | "Highlight the trajectory by making it bold or using colors. The dashed lines are not clear"                            |
| Selection of Single Vehicles Via Context Menu                      | 1 | 5.00            | "I want to be able to directly access a single shuttle from the map"                                                    |
| Clearer Display of Destination                                     | 1 | 5.00            | "It is not clear where the shuttle is headed to"                                                                        |

|                                                                |   |      |                                                                                                                |
|----------------------------------------------------------------|---|------|----------------------------------------------------------------------------------------------------------------|
| Display of Street Names                                        | 1 | 4.00 | "I want to see the names of the streets in the environment"                                                    |
| Color-Coding of Disturbances by Priority                       | 1 | 4.00 | "Color-codes could help to see how serious a disturbance is"                                                   |
| Larger Segment of Map                                          | 1 | 4.00 | "The default segment is a bit too small"                                                                       |
| Automatic Tracking of Trajectory                               | 1 | 4.00 | "Automatically track the trajectory of the shuttle"                                                            |
| Display of Number of Passengers at Pick Up and Drop Off Points | 1 | 3.00 | "Mark how many people want to get on and off the shuttle"                                                      |
| <i>Touchscreen</i>                                             |   |      |                                                                                                                |
| Legend of Symbols Currently Displayed                          | 1 | 5.00 | "Which symbols mean what? Legends like that would be useful for currently displayed elements"                  |
| <i>Camera View</i>                                             |   |      |                                                                                                                |
| Moving Cameras                                                 | 3 | 4.00 | "Being able to control the cameras, for example move them or zoom in, would be a meaningful improvement"       |
| Less Screens                                                   | 2 | 4.00 | "One monitor is enough"                                                                                        |
| Camera Showing Vehicle from Outside                            | 2 | 3.50 | "Having a bird-view outside camera would help avoiding the blind spot"                                         |
| Camera with 360° View Inside the Vehicle                       | 1 | 5.00 | "A dome camera on board would help the detect problems in the passenger cabin when no passengers are on board" |
| Camera View Below the Vehicle                                  | 1 | 5.00 | "Looking below the vehicle could help detect damages on the shuttle's bottom"                                  |
| Show All Camera Images Simultaneously                          | 1 | 4.00 | "I want to see every camera image that is available for a shuttle without having to switch views"              |
| Change Segment of Camera Images                                | 1 | 4.00 | "I want to be able to move the map around"                                                                     |
| More Intuitive Use                                             | 1 | 3.00 | "The interface could be more intuitive to use to avoid changes between the screens"                            |
| Selecting Cameras from Map View                                | 1 | 3.00 | "For example, choosing the camera from the map view by clicking on the vehicle"                                |
| Show Most Information on Central Screen                        | 1 | 3.00 | "70 percent of information should be presented on a central screen"                                            |
| <i>Further Features Missed</i>                                 |   |      |                                                                                                                |
| Manual Teleoperation                                           | 1 | 5.00 | "I want to have the option to remote-control the vehicle manually"                                             |
| Documentation of Previous Trajectories                         | 1 | 5.00 | "It would be useful to be able to document trajectories"                                                       |
| Distinction between User Roles                                 | 1 | 5.00 | "I think logging in with different roles, such as disposal or passenger information responsible, could help"   |
| Display of Previous Trajectories                               | 1 | 5.00 | "It would be useful to be able to review trajectories from the past"                                           |
| Division of Responsibilities by Area                           | 1 | 5.00 | "You can divide the area into subareas, so everyone is responsible for their area"                             |

---

|                                              |   |      |                                                                                             |
|----------------------------------------------|---|------|---------------------------------------------------------------------------------------------|
| Color-Coding of Reasons for Disturbances     | 1 | 4.00 | "It would be helpful to use different colors for different reasons for disturbances"        |
| Direct Communication Link to Passenger Cabin | 1 | 4.00 | "I would like to be able to talk into the passenger cabin of a single or multiple shuttles" |
| Changing Trajectories                        | 1 | 4.00 | "I need to be able to change the path the shuttle follows"                                  |
| Abort Ride                                   | 1 | 4.00 | "I want to be able to stop the ride"                                                        |

---

**Table S3.** Overview of missing information parameters (complete)

| Information Parameter Missed                              | N | M<br>Importance | Typical Utterance                                                                                                                                        |
|-----------------------------------------------------------|---|-----------------|----------------------------------------------------------------------------------------------------------------------------------------------------------|
| <i>Shuttle Details</i>                                    |   |                 |                                                                                                                                                          |
| Occupancy                                                 | 2 | 4.50            | "I want to know how many passengers are in the vehicle"                                                                                                  |
| Previous Stop                                             | 1 | 5.00            | "To understand the context, knowing what the stop prior to the upcoming one was can help"                                                                |
| Information on Actions                                    | 1 | 5.00            | "A description of the consequences of actions would help"                                                                                                |
| Destination                                               | 1 | 4.00            | "The end of the current ride should be stated somewhere"                                                                                                 |
| Long-Term Trajectory                                      | 1 | 4.00            | "I want to see the trajectory beyond the next couple of stops"                                                                                           |
| <i>Disturbance Ticker</i>                                 |   |                 |                                                                                                                                                          |
| Clearly Defined Communication Partners                    | 1 | 5.00            | "The description of communication partners should be clear and unambiguous"                                                                              |
| Direction of Travel                                       | 1 | 4.00            | "The direction of travel is missing"                                                                                                                     |
| <i>Map View</i>                                           |   |                 |                                                                                                                                                          |
| Exact Position with Street Names and House Numbers        | 2 | 5.00            | "The exact position with street names house numbers should be shown in the map"                                                                          |
| Information on Infrastructure and Other Additional Layers | 2 | 3.00            | "Elements from the infrastructure, such as cameras on stops, should be visible on the map"                                                               |
| Mark Closed Areas                                         | 1 | 5.00            | "I need to determine closed areas in the map, e.g. when I receive notifications from the police"                                                         |
| Code Trajectories                                         | 1 | 5.00            | "Driving paths should be coded so they be followed easily, using colors or symbols"                                                                      |
| Company Responsible for Bus Shelter                       | 1 | 5.00            | "Show the company that set up and maintains a bus shelter on the map"                                                                                    |
| Names of Stops                                            | 1 | 4.00            | "Show the names of stops on the map"                                                                                                                     |
| Aerial Map                                                | 1 | 4.00            | "One should be able to see an aerial map, otherwise it's hard to imagine the area"                                                                       |
| Details on Field Engineers                                | 1 | 3.00            | "I need to estimate how far away available field engineers are from the place of disturbance, so I can estimate how long it will take them to get there" |
| <i>Camera View</i>                                        |   |                 |                                                                                                                                                          |
| View of Vehicle's Bottom                                  | 1 | 5.00            | "Seeing the bottom part of the vehicle can help me see if objects below it block the sensors, such as toys"                                              |
| Time                                                      | 1 | 5.00            | "I want to see the current time so I can make the system isn't frozen"                                                                                   |
| Overall System State                                      | 1 | 5.00            | "A lamp showing the overall system state would help to make sure that the system is available"                                                           |
| Lateral Cameras                                           | 1 | 5.00            | "Cameras on the left and right side of the shuttle could help me become aware of blind spots"                                                            |
| Blind Spots                                               | 1 | 4.00            | "Are there any blind spots on the video images?"                                                                                                         |

|                                           |   |      |                                                                                             |
|-------------------------------------------|---|------|---------------------------------------------------------------------------------------------|
| Gaps in Video Images                      | 1 | 4.00 | "Do the camera images merge, like in 360 degrees view, or are there any gaps?"              |
| Velocity                                  | 1 | 3.00 | "I would like to see the current speed"                                                     |
| <i>Further Information Parameters</i>     |   |      |                                                                                             |
| <i>Missed</i>                             |   |      |                                                                                             |
| Numbers of Vehicles Available             | 1 | 5.00 | "How many vehicles are currently available?"                                                |
| Rate of Vehicle Capacity Used             | 1 | 5.00 | "What is the percentage of all shuttle seats occupied?"                                     |
| Number of Shuttles under Maintenance      | 1 | 5.00 | "How many shuttles are in the maintenance facility right now?"                              |
| Process of Handling Vehicles out of Order | 1 | 5.00 | "What happens with a shuttle that can't be used any more?"                                  |
| General Overview Fleet                    | 1 | 5.00 | "I need an overview over the entire fleet of shuttles"                                      |
| Degree of Occupancy                       | 1 | 3.00 | "How full is the shuttle?"                                                                  |
| Numbers of Vehicles Running               | 1 | 2.00 | "How many shuttles are out there?"                                                          |
| Color-Code of Vehicle State               | 1 | 2.00 | "I want to see with one glance if the shuttle is okay, e.g. when it is green on the screen" |

**Table S4.** Overview of additional improvement suggestions (complete)

| <b>Improvements Suggested</b>                                                                                                                      | <b>N</b> |
|----------------------------------------------------------------------------------------------------------------------------------------------------|----------|
| <i>Design</i>                                                                                                                                      |          |
| Only Relevant Information / Clear Presentation                                                                                                     | 3        |
| Prioritize / Highlight Particularly Important Information                                                                                          | 2        |
| Less Monitors / All Video Images on one Monitor                                                                                                    | 2        |
| Monitor for Overview                                                                                                                               | 2        |
| Same Structure for All Menus                                                                                                                       | 1        |
| Customizable Distribution of Information Across Screens                                                                                            | 1        |
| Integration in Existing Control Center Operations System                                                                                           | 1        |
| <i>Details Screen</i>                                                                                                                              |          |
| No Display of Upcoming Stops                                                                                                                       | 1        |
| Show Actual Departure Times Only                                                                                                                   | 1        |
| Controlling Distribution of Shuttles in Operating Area                                                                                             | 1        |
| Exact Position of Shuttle                                                                                                                          | 1        |
| <i>Disturbances Screen</i>                                                                                                                         |          |
| Only one Click for Accepting and Editing Disturbance Notification                                                                                  | 3        |
| Categorizing Incoming Disturbance / Delay Notifications                                                                                            | 3        |
| Highlighting / Prioritizing Incoming Disturbance Notifications                                                                                     | 3        |
| Improving Check of Prerequisites for Clearance (Making Them Faster / Customizable / Immediately After Each Step in Disturbance Resolution Process) | 3        |
| Documenting Prerequisite Checks for Clearance / Disturbances                                                                                       | 2        |
| Displaying Further Communication Partners                                                                                                          | 1        |
| Displaying Further Actions                                                                                                                         | 1        |
| <i>Map Screen</i>                                                                                                                                  |          |
| Showing Driving Path Only After Selecting Shuttle                                                                                                  | 1        |
| Showing Traffic Density Only If Driving Path Can Be Adjusted                                                                                       | 1        |
| Clearer Map with Details Accessible via Context Menu                                                                                               | 1        |
| Showing Delays on Map                                                                                                                              | 1        |
| <i>Touchscreen</i>                                                                                                                                 |          |
| Marking Bypasses                                                                                                                                   | 2        |
| <i>Video Screens</i>                                                                                                                               |          |
| Cameras at Every Stop                                                                                                                              | 1        |
| Recording Video Images                                                                                                                             | 1        |
